# Supplementary material for: Molecular Characterization of Outer Capsid Proteins VP5 and VP7 of Grass Carp Reovirus
Source: MDPI journal article supplement (doi:10.3390/v14051032), 2022-05-12
Supplement: s1 [file s1]

## Supplementary materials

Table S1. Identification of peptide fragments generated from tryptic digestion of GCRV-VP5

| No. | Start–<br>End | Peptide Sequence                               | Length | <i>m/z</i><br>(Observed) | <i>ppm</i> |
|-----|---------------|------------------------------------------------|--------|--------------------------|------------|
| 1   | 43–67         | PTGKLWRPVGTSVATIDSLAIVSDR                      | 25     | 880.4876                 | –1         |
| 2   | 43–79         | PTGKLWRPVGTSVATIDSLAIVSDRFGQYSFVNEGMR          | 37     | 1,014.5255               | 0          |
| 3   | 47–67         | LWRPVGTSVATIDSLAIVSDR                          | 21     | 1,128.6216               | –1         |
| 4   | 47–79         | LWRPVGTSVATIDSLAIVSDRFGQYSFVNEGMR              | 33     | 922.7188                 | –1         |
| 5   | 47–84         | LWRPVGTSVATIDSLAIVSDRFGQYSFVNEGMRETFSK         | 38     | 1,070.7909               | –1         |
| 6   | 49–67         | RPVGTSVATIDSLAIVSDR                            | 19     | 979.0374                 | –2         |
| 7   | 50–67         | PVGTSVATIDSLAIVSDR                             | 18     | 900.9891                 | 0          |
| 8   | 50–79         | PVGTSVATIDSLAIVSDRFGQYSFVNEGMR                 | 30     | 1,072.8648               | –5         |
| 9   | 68–79         | FGQYSFVNEGMR                                   | 12     | 717.8276                 | 0          |
| 10  | 68–84         | FGQYSFVNEGMRETFSK                              | 17     | 1,021.9659               | –1         |
| 11  | 80–100        | ETFSKALFDINMWQPLFQATK                          | 21     | 844.4253                 | –1         |
| 12  | 85–100        | ALFDINMWQPLFQATK                               | 16     | 646.9977                 | 0          |
| 13  | 123–147       | AGDALDNPVTNGVFISTVQIMNLQR                      | 25     | 891.7945                 | 1          |
| 14  | 126–147       | ALDNPVTNGVFISTVQIMNLQR                         | 22     | 810.7610                 | –5         |
| 15  | 153–161       | MRDVALWQK                                      | 9      | 573.8072                 | 1          |
| 16  | 155–161       | DVALWQK                                        | 7      | 430.2374                 | 0          |
| 17  | 162–184       | HLDTAMTMLTPDISAGSASCNWK                        | 23     | 844.0332                 | 0          |
| 18  | 185–191       | SLLAFAK                                        | 7      | 375.2319                 | 0          |
| 19  | 192–214       | DILPLDNLCLTYPNEFYNVAIHR                        | 23     | 938.4453                 | –5         |
| 20  | 201–214       | L TYPNEFYNVAIHR                                | 14     | 579.6302                 | 0          |
| 21  | 215–226       | YPALKPGNPDTK                                   | 12     | 434.2342                 | –1         |
| 22  | 215–243       | YPALKPGNPDTKL PDAQAHPLGEVAGAFN                 | 29     | 996.8448                 | 1          |
| 23  | 244–269       | AATSEVGS L VGSSSTLSQAISTMAGK                   | 26     | 1,220.6155               | 0          |
| 24  | 268–292       | GKDLDLIEADTLPVSVFTPSLAPR                       | 25     | 884.4814                 | 0          |
| 25  | 270–292       | DLDLIEADTLPVSVFTPSLAPR                         | 23     | 849.4308                 | 0          |
| 26  | 293–318       | SYRPAFIKPEDAKWIAEFNNSLIRK                      | 26     | 616.9316                 | –1         |
| 27  | 319–337       | TLTYSGATYTVQLGPGPTR                            | 19     | 992.0123                 | 0          |
| 28  | 404–412       | AINLAINVR                                      | 9      | 492.3017                 | 1          |
| 29  | 417–428       | FNMLHLQATFER                                   | 12     | 513.6077                 | 0          |
| 30  | 444–472       | LIPSPTSSSNFSNPTLMDGLLTVTPVLLR                  | 29     | 1,029.5585               | 5          |
| 31  | 473–516       | ETTYKGEVVDAIVPATV MANQTSEEVASALANDAIVLVS NHLNK | 44     | 1,153.8408               | –1         |
| 32  | 517–542       | LANVVGDAIPVASRTDDSAIVSR                        | 26     | 1,293.1757               | –3         |
| 33  | 543–567       | LAVQHKLSQVGQASPTPPDYPLLWR                      | 25     | 701.1326                 | 0          |
| 34  | 543–568       | LAVQHKLSQVGQASPTPPDYPLLWRR                     | 26     | 740.1588                 | 1          |
| 35  | 571–609       | RAASMFVSNPSLALQVGIPVLTQSGMLSALTSGVGTALR        | 39     | 1,301.0393               | 0          |
| 36  | 610–625       | TGSLGKGVTDASEKLR                               | 16     | 540.2968                 | 0          |
| 37  | 626–648       | ARQSLTVAKQAFFDQIGSLWPGK                        | 23     | 850.1263                 | –1         |
| 38  | 635–648       | QAFFDQIGSLWPGK                                 | 14     | 797.4063                 | 0          |

*m/z*: mass charge ratio

Table S2. Identification of peptide fragments generated from tryptic digestion of GCRV-VP7

| No. | Start-End | Peptide Sequence        | Length | <i>m/z</i><br>(Observed) | <i>ppm</i> |
|-----|-----------|-------------------------|--------|--------------------------|------------|
| 1   | 28-45     | TRTETTNFDHAEYVTCGR      | 18     | 634.2912                 | 5          |
| 2   | 64-80     | TIQDSHACSRQPNEAIR       | 17     | 1,008.005                | -1         |
| 3   | 81-88     | SLVEVSDK                | 8      | 438.7404                 | 2          |
| 4   | 81-97     | SLVEVSDKAQTALVGSR       | 17     | 587.3347                 | 4          |
| 5   | 98-107    | TVDYHELDVK              | 10     | 406.8809                 | -2         |
| 6   | 108-123   | AGFVAPTADETIAPSK        | 16     | 787.9172                 | 3          |
| 7   | 124-131   | DIVELPFR                | 8      | 494.7855                 | 4          |
| 8   | 132-145   | TCDLDDSSATACVR          | 14     | 785.8324                 | 1          |
| 9   | 146-166   | NHCQAGHDGVIHLPILSGDFK   | 21     | 595.5674                 | 1          |
| 10  | 167-184   | LPNEHPTKPLDDTHPHDK      | 18     | 547.5541                 | 0          |
| 11  | 192-214   | TGLLLVHDTHAHATAVVATAATR | 23     | 582.3337                 | 5          |
| 12  | 215-234   | AILMHDLTTSANADDGHQAR    | 20     | 538.0168                 | 1          |

*m/z*: mass charge ratio
